# Supplementary material
Source: PubMed Central journal article supplement (PMC9871983)
Supplement: NIHMS1860862-supplement-SI.pdf [file NIHMS1860862-supplement-SI.pdf]

## Supplementary Information

### Computational Details for 20 ns FEP simulations

The complete initial structure with dual topology was subjected to an initial relaxation for 4000 steps and then 6 ns long equilibration at 298 K was performed in two independent simulations, where the  $\lambda$  was set to 0 and 1. Then, the structures (saved every 4 ps) from last 5 ns of each simulation were subjected to cluster analysis, where they were categorized under 5 groups based on RMSD from the initial structure. Then, a structure from each group was extracted to be used in a subsequent FEP calculation. Therefore, the free energy differences were calculated at least 5 times for each mutation with each starting from a distinct initial structure.

Based on the preliminary considerations, we decided to perform each mutation in 60 windows and sample each window for 170 ps providing over 20 ns of total simulation time for each calculation including the forward and backward sampling. To avoid singularity at small interaction distance, when  $\lambda$  approaches to 0 or 1 (called endpoint-catastrophe), we used soft core Lennard-Jones potential. Although this will ensure to avoid the endpoint-catastrophe, we also used a soft core potential with our adapted 60-window scheme: [ $\lambda=0.0, 0.0001, 0.001, 0.01, 0.05, 0.1, 0.12, 0.14, 0.16, 0.18, \dots, 0.86, 0.88, 0.90, 0.95, 0.99, 0.9999, 1.0$ ] In addition, we ran another 10 ns-long ‘backward’ simulation for each simulation, where the transformation is achieved from the mutant to the wild-type. This backward simulation was set to start from exactly where the forward simulation ended.

### Analysis of FEP: BAR Method

For two states A and B, the BAR method uses sampling on both A and B together with a constant C to calculate  $\Delta G$ :

$$\Delta G = -kT \ln \frac{\langle e^{-(U_B - U_A - C)kT} \rangle_A}{\langle e^{-(U_B - U_A + C)kT} \rangle_B} e^{-C/kT}$$

The optimal value of C, which is when it is equal to  $\Delta G$ , is then iteratively optimized to convergence. This gives the maximum-likelihood of value of the free energy with the statistical error. Again, this calculation is divided into windows and by combining C values from each window, we will obtain overall  $\Delta G$  with statistical error.

**SI Table 1.** Results from Other Webservers and 20 ns-long FEP simulations. The latter were not completed for all due to unrealistically high results obtained. \*FEP technically cannot be applied to

Pro-

| MBD Mutants  | $\Delta\Delta G$ (kcal/mol, negative means stabilizing) |               |              |              |            |            |              |            |
|--------------|---------------------------------------------------------|---------------|--------------|--------------|------------|------------|--------------|------------|
|              | Cupsat (1qk9)                                           | Cupsat (3c2i) | dFIRE (1qk9) | dFIRE (3c2i) | SDM (1qk9) | SDM (3c2i) | MuStab (Seq) | FEP (1qk9) |
| <b>T158M</b> | 0.56                                                    | -0.12         | -1.40        | -4.67        | -1.55      | -1.35      | +            | 0.64       |
| <b>R133C</b> | -0.26                                                   | -1.57         | 1.21         | 1.21         | 0.65       | -0.3       | +            | 8.31       |
| <b>R106W</b> | 2.32                                                    | 2.33          | 1.16         | -1.36        | -2.02      | -1.9       | -            | 8.12       |
| <b>P152R</b> | 0.77                                                    | 1.53          | -0.33        | -4.18        | 1.53       | 0.77       | +            | *          |
| <b>A140V</b> | 0.28                                                    | -             | 0.49         | -2.91        | 1.57       | 1.42       | +            | -1.4       |
| <b>S134C</b> | 0.18                                                    | 0.06          | -0.69        | -3.57        | 0.68       | 0.11       | -            | 0.90       |
| <b>R106Q</b> | 2.46                                                    | 5.93          | 1.02         | -2.80        | 0.14       | 0.62       | -            | -          |
| <b>D156E</b> | -0.06                                                   | 0.81          | -1.51        | -3.67        | -0.6       | -0.11      | -            | 18.0       |
| <b>R133H</b> | -0.26                                                   | -1.5          | -0.37        | -2.56        | 0.46       | -1.23      | +            | 8.03       |
| <b>L100V</b> | 0.59                                                    | 1.65          | -1.84        | -5.21        | 0.63       | 0.94       | +            | -0.52      |
| <b>F155S</b> | 1.71                                                    | 3.52          | -5.73        | -8.72        | 4.88       | 3.88       | +            | 5.03       |
| <b>T158A</b> | 0.69                                                    | 0.60          | -1.59        | -6.64        | -2.00      | 0.02       | +            | 0.12       |
| <b>R111G</b> | 0.64                                                    | -0.99         | 0.43         | 0.37         | 0.77       | 2.61       | -            | -          |

involving mutations. MuStab conditions: pH=7 and T=25 degrees Celsius.

**SI Table 2.** Percent relative solvent accessibility (SASA) of wild-type and mutant structures (1QK9 and 3C2I) and the change in SASA upon each mutation. SASA was normalized by dividing the absolute SASA value obtained for the residue in question in the protein by its value in the three-residue segment from the same protein, where the residue in question is in the middle.

|              | SASA<br>1qk9 | SASA<br>Change | SASA<br>3c2i | SASA<br>Change |
|--------------|--------------|----------------|--------------|----------------|
| <b>L100</b>  | 16.5         |                | 24.5         |                |
| <b>L100V</b> | 6            | -10.5          | 32.1         | 7.6            |
| <b>R106</b>  | 11           |                | 4.2          |                |
| <b>R106W</b> | 7            | -4             | 2.8          | -1.4           |
| <b>P152</b>  | 29.3         |                | 12.7         |                |
| <b>P152R</b> | 36           | 0.1            | 20           | 0.1            |
| <b>R133</b>  | 44.2         |                | 60           |                |
| <b>R133C</b> | 45           | 0.8            | 49.2         | -10.7          |
| <b>R133H</b> | 38.4         | -5.8           | 37.6         | -22.4          |
| <b>S134</b>  | 41.3         |                | 42.7         |                |
| <b>S134C</b> | 64.1         | 22.9           | 42.2         | -0.5           |
| <b>R106Q</b> | 18.6         | 0.1            | 17.4         | 0.1            |
| <b>A140</b>  | 41.2         |                | 50.4         |                |
| <b>A140V</b> | 53.1         | 11.8           | 60.4         | 10             |
| <b>F155</b>  | 3.3          |                | 6.8          |                |
| <b>F155S</b> | 32.1         | 28.8           | 7.9          | 1.2            |
| <b>D156</b>  | 28.3         |                | 6.9          |                |
| <b>D156E</b> | 40.1         | 11.8           | 4.6          | -2.3           |
| <b>T158</b>  | 37.4         |                | 45.4         |                |
| <b>T158A</b> | 25.6         | -11.8          | 32.1         | -13.3          |
| <b>T158M</b> | 43.6         | 6.2            | 50.8         | 5.4            |
| <b>R111</b>  | 59.4         |                | 43.7         |                |
| <b>R111G</b> | 41           | -0.2           | 25.8         | -0.2           |

**SI Table 3: Salt bridges in WT and mutant structures**

| Structures |      | E137-R133 | D156-R106 | D97-R106 | D121-R111 | D156-R162 |
|------------|------|-----------|-----------|----------|-----------|-----------|
| WT         | 1QK9 | ✓         | X         | ✓        | ✓         | ✓         |
|            | 3C2I | ✓         | ✓         | ✓        | ✓         | ✓         |
| T158M      | 1QK9 | ✓         | X         | ✓        | ✓         | ✓         |
|            | 3C2I | ✓         | ✓         | ✓        | ✓         | ✓         |
| R133C      | 1QK9 | X         | X         | ✓        | ✓         | ✓         |
|            | 3C2I | X         | ✓         | ✓        | ✓         | ✓         |
| R106W      | 1QK9 | ✓         | X         | X        | X         | ✓         |
|            | 3C2I | ✓         | X         | X        | ✓         | ✓         |
| A140V      | 1QK9 | ✓         | X         | ✓        | ✓         | ✓         |
|            | 3C2I | ✓         | ✓         | ✓        | ✓         | ✓         |
| S134C      | 1QK9 | ✓         | X         | ✓        | ✓         | ✓         |
|            | 3C2I | ✓         | ✓         | ✓        | ✓         | ✓         |
| D156E      | 1QK9 | ✓         | ✓         | ✓        | ✓         | X         |
|            | 3C2I | ✓         | X         | ✓        | X         | ✓         |
| R133H      | 1QK9 | X         | X         | ✓        | ✓         | ✓         |
|            | 3C2I | ✓         | ✓         | ✓        | ✓         | ✓         |
| L100V      | 1QK9 | ✓         | X         | ✓        | ✓         | ✓         |
|            | 3C2I | ✓         | ✓         | ✓        | ✓         | ✓         |
| F155S      | 1QK9 | ✓         | ✓         | X        | ✓         | ✓         |
|            | 3C2I | ✓         | X         | ✓        | X         | ✓         |
| T158A      | 1QK9 | ✓         | X         | ✓        | ✓         | ✓         |
|            | 3C2I | ✓         | ✓         | X        | ✓         | ✓         |
| R111G      | 1QK9 | ✓         | X         | ✓        | X         | ✓         |
|            | 3C2I | ✓         | ✓         | X        | X         | ✓         |
| R106Q      | 1QK9 | ✓         | X         | X        | X         | X         |
|            | 3C2I | ✓         | X         | X        | ✓         | ✓         |
| P152R      | 1QK9 | ✓         | X         | ✓        | X         | ✓         |
|            | 3C2I | ✓         | ✓         | ✓        | ✓         | ✓         |
